# Supplementary material for: Forage yields and nutritive values of oat and triticale pastures for grazing sheep in early spring
Source: PeerJ journal article supplement (doi:10.7717/peerj.17840), 2024-08-22
Supplement: Raw_Data.xlsx [file Raw_Data.xlsx]

## Sheet: Sayfa1
Year	Pasture	Recurrence	Dry matter yield (t ha−1)	Dry matter intake (g/day/sheep)
2015	Triticale	1	10.364	2426.9
2015	Triticale	2	10.028	2150.3
2015	Triticale	3	10.339	1908.2
2015	Oat	1	11.242	2389.7
2015	Oat	2	9.565	2660
2015	Oat	3	9.356	2453.1
2016	Triticale	1	10.872	2210.9
2016	Triticale	2	15.025	2488.5
2016	Triticale	3	13.007	2745.1
2016	Oat	1	16.877	2856.9
2016	Oat	2	17.459	2635
2016	Oat	3	15.432	2983.1
2017	Triticale	1	11.359	1272.9
2017	Triticale	2	10.693	1235.6
2017	Triticale	3	8.005	1593.5
2017	Oat	1	9.943	1794
2017	Oat	2	9.423	1521.6
2017	Oat	3	8.608	115.8

## Sheet: Dry matter intake
Year	Pasture	Periot	Recurrence	Dry matter yield (t ha−1)	Dry matter yield (t ha−1)	Dry matter intake kg/da	Dry matter intake/Parcel	kg/day	kg/sheep	g/day/sheep
2015	Triticale	15 April	1	71.2	0.712	272.8	163.68	11.6914	2.92286	2922.86
2015	Triticale	15 April	2	24	0.24	160.8	96.48	6.89143	1.72286	1722.86
2015	Triticale	15 April	3	49.1	0.491	129.1	77.46	5.53286	1.38321	1383.21
2015	Triticale	29 April	1	502.8	5.028	263.5	158.1	11.2929	2.82321	2823.21
2015	Triticale	29 April	2	579.4	5.794	230.8	138.48	9.89143	2.47286	2472.86
2015	Triticale	29 April	3	578.3	5.783	191.1	114.66	8.19	2.0475	2047.5
2015	Triticale	2024-05-07	1	67.2	0.672	62.3	37.38	4.15333	1.03833	1038.33
2015	Triticale	2024-05-07	2	52.4	0.524	138.8	83.28	9.25333	2.31333	2313.33
2015	Triticale	2024-05-07	3	67.5	0.675	150.5	90.3	10.0333	2.50833	2508.33
2015	Oat	15 April	1	40.5	0.405	245.7	147.42	10.53	2.6325	2632.5
2015	Oat	15 April	2	77.4	0.774	272.2	163.32	11.6657	2.91643	2916.43
2015	Oat	15 April	3	68.4	0.684	295.5	177.3	12.6643	3.16607	3166.07
2015	Oat	29 April	1	692.4	6.924	284.8	170.88	12.2057	3.05143	3051.43
2015	Oat	29 April	2	573.6	5.736	250	150	10.7143	2.67857	2678.57
2015	Oat	29 April	3	520	5.2	228.9	137.34	9.81	2.4525	2452.5
2015	Oat	2024-05-07	1	75.7	0.757	58.7	35.22	3.91333	0.978333	978.333
2015	Oat	2024-05-07	2	35.3	0.353	73.7	44.22	4.91333	1.22833	1228.33
2015	Oat	2024-05-07	3	52	0.52	80.7	48.42	5.38	1.345	1345
2016	Triticale	21 April	1	386	3.86	246.2	147.72	7.386	1.40686	1406.86
2016	Triticale	21 April	2	573.5	5.735	401.9	241.14	12.057	2.29657	2296.57
2016	Triticale	2024-04-21	3	501.8	5.018	485.6	291.36	14.568	2.77486	2774.86
2016	Triticale	21 April	1	150.1	1.501	566.3	339.78	15.4445	2.94182	2941.82
2016	Triticale	2024-05-12	2	481.2	4.812	512.6	307.56	13.98	2.66286	2662.86
2016	Triticale	2024-05-12	3	184.9	1.849	523.6	314.16	14.28	2.72	2720
2016	Oat	21 April	1	442.8	4.428	427.5	256.5	12.825	2.48066	2480.66
2016	Oat	21 April	2	377.3	3.773	277.3	166.38	8.319	1.60909	1609.09
2016	Oat	2024-04-21	3	586.4	5.864	486.4	291.84	14.592	2.82244	2822.44
2016	Oat	21 April	1	551.4	5.514	606.4	363.84	16.5382	3.19887	3198.87
2016	Oat	2024-05-12	2	591.2	5.912	676.3	405.78	18.4445	3.56761	3567.61
2016	Oat	2024-05-12	3	318.2	3.182	593.2	355.92	16.1782	3.12924	3129.24
2017	Triticale	28 April	1	694.3	6.943	268.8	161.28	9.48706	1.77994	1779.94
2017	Triticale	28 April	2	498	4.98	259.9	155.94	9.17294	1.721	1721
2017	Triticale	28 April	3	292.6	2.926	291.2	174.72	10.2776	1.92826	1928.26
2017	Triticale	2024-05-18	1	124.1	1.241	160.9	96.54	4.59714	0.862503	862.503
2017	Triticale	2024-05-18	2	288	2.88	157.2	94.32	4.49143	0.84267	842.67
2017	Triticale	2024-05-18	3	278.5	2.785	246.7	148.02	7.04857	1.32243	1322.43
2017	Oat	28 April	1	557.1	5.571	413.2	247.92	14.5835	2.69069	2690.69
2017	Oat	28 April	2	383.9	3.839	239.3	143.58	8.44588	1.55828	1558.28
2017	Oat	28 April	3	349.2	3.492	215.8	129.48	7.61647	1.40525	1405.25
2017	Oat	2024-05-18	1	150.7	1.507	202.6	121.56	5.78857	1.068	1068
2017	Oat	2024-05-18	2	266	2.66	283	169.8	8.08571	1.49183	1491.83
2017	Oat	2024-05-18	3	255.9	2.559	222.5	133.5	6.35714	1.1729	1172.9

## Sheet: Dry matter yield
Year	Pasture	Periot	Recurrence	Dry matter yield (t ha−1)	Dry matter yield (t ha−1)
2015	Triticale	1 April	1	395.24	3.9524
2015	Triticale	1 April	2	346.98	3.4698
2015	Triticale	1 April	3	338.99	3.3899
2015	Triticale	15 April	1	71.2	0.712
2015	Triticale	15 April	2	24	0.24
2015	Triticale	15 April	3	49.1	0.491
2015	Triticale	29 April	1	502.8	5.028
2015	Triticale	29 April	2	579.4	5.794
2015	Triticale	29 April	3	578.3	5.783
2015	Triticale	2024-05-07	1	67.2	0.672
2015	Triticale	2024-05-07	2	52.4	0.524
2015	Triticale	2024-05-07	3	67.5	0.675
2015	Oat	1 April	1	315.6	3.156
2015	Oat	1 April	2	270.2	2.702
2015	Oat	1 April	3	295.2	2.952
2015	Oat	15 April	1	40.5	0.405
2015	Oat	15 April	2	77.4	0.774
2015	Oat	15 April	3	68.4	0.684
2015	Oat	29 April	1	692.4	6.924
2015	Oat	29 April	2	573.6	5.736
2015	Oat	29 April	3	520	5.2
2015	Oat	2024-05-07	1	75.7	0.757
2015	Oat	2024-05-07	2	35.3	0.353
2015	Oat	2024-05-07	3	52	0.52
2016	Triticale	1 April	1	551.08	5.5108
2016	Triticale	1 April	2	447.79	4.4779
2016	Triticale	1 April	3	613.96	6.1396
2016	Triticale	21 April	1	386	3.86
2016	Triticale	21 April	2	573.5	5.735
2016	Triticale	21 April	3	501.8	5.018
2016	Triticale	2024-05-12	1	150.1	1.501
2016	Triticale	2024-05-12	2	481.2	4.812
2016	Triticale	2024-05-12	3	184.9	1.849
2016	Oat	1 April	1	693.49	6.9349
2016	Oat	1 April	2	777.42	7.7742
2016	Oat	1 April	3	638.62	6.3862
2016	Oat	21 April	1	442.8	4.428
2016	Oat	21 April	2	377.3	3.773
2016	Oat	21 April	3	586.4	5.864
2016	Oat	2024-05-12	1	551.4	5.514
2016	Oat	2024-05-12	2	591.2	5.912
2016	Oat	2024-05-12	3	318.2	3.182
2017	Triticale	11 April	1	317.48	3.1748
2017	Triticale	11 April	2	283.34	2.8334
2017	Triticale	11 April	3	229.44	2.2944
2017	Triticale	28 April	1	694.3	6.943
2017	Triticale	28 April	2	498	4.98
2017	Triticale	28 April	3	292.6	2.926
2017	Triticale	2024-05-18	1	124.1	1.241
2017	Triticale	2024-05-18	2	288	2.88
2017	Triticale	2024-05-18	3	278.5	2.785
2017	Oat	11 April	1	286.5	2.865
2017	Oat	11 April	2	292.44	2.9244
2017	Oat	11 April	3	255.67	2.5567
2017	Oat	28 April	1	557.1	5.571
2017	Oat	28 April	2	383.9	3.839
2017	Oat	28 April	3	349.2	3.492
2017	Oat	2024-05-18	1	150.7	1.507
2017	Oat	2024-05-18	2	266	2.66
2017	Oat	2024-05-18	3	255.9	2.559

## Sheet: Dry matter yield-1
		Dray matter yield		2015
	1 April	15 April	29 April	7 May
Triticale	3.604	0.481	5.535	0.624
Oat	2.937	0.621	5.953	0.543
	36.04	4.81	55.35	6.24
	29.37	6.21	59.53	5.43
				2016
	1 April	21 April	12 May
Triticale	5.376	4.871	2.721
Oat	7.032	4.688	4.869
	53.76	48.71	27.21
	70.32	46.88	48.69
				2017
	11 April	28 April	18 May
Triticale	2.768	4.95	2.302
Oat	2.782	4.301	2.242
	27.68	49.5	23.02
	27.82	43.01	22.42

## Sheet: Dry matter intake-1
		Dray matter intake
	1 April	15 April	29 April	7 May
Triticale	0	2009.6	2447.9	1953.3
Oat	0	2905	2727.5	1183.9
	1 April	21 April	12 May
Triticale	0	2159.4	2774.9
Oat	0	2304.1	3298.6
	11 April	28 April	18 May
Triticale	0	1809.7	1009.2
Oat	0	1884.7	1244.2

## Sheet: CP
		Crude protein
	1 April	15 April	29 April	7 May
Triticale	13.04	10.77	8.38	8.62
Oat	11.56	10.35	8.58	9.96
	1 April	21 April	12 May
Triticale	13.98	11.52	12.55
Oat	15.6	11.76	11.32
	11 April	28 April	18 May
Triticale	15.18	17.43	9.57
Oat	16.12	17.41	13.5

## Sheet: NDF
		NDF
	1 April	15 April	29 April	7 May
Triticale	44.9	48.54	61.06	58.22
Oat	44.15	47.65	54.54	55.04
	1 April	21 April	12 May
Triticale	46.77	55.68	58.47
Oat	44.85	54.18	58.96
	11 April	28 April	18 May
Triticale	48.74	47.4	64.76
Oat	42.28	45.14	64.28

## Sheet: ADF
		ADF
	1 April	15 April	29 April	7 May
Triticale	17.35	17.17	20.01	21.01
Oat	18.31	16.98	19.74	17.93
	1 April	21 April	12 May
Triticale	22.55	28.6	33.04
Oat	21.98	27.19	31.02
	11 April	28 April	18 May
Triticale	35.66	23.14	43.54
Oat	34.68	23.09	42.53

## Sheet: ADL
		ADL
	1 April	15 April	29 April	7 May
Triticale	5.77	3.31	4.41	5.41
Oat	5.44	5.08	4.85	7.16
	1 April	21 April	12 May
Triticale	4.17	5	5.92
Oat	3.85	4.4	5.03
	11 April	28 April	18 May
Triticale	4.26	1.59	7.02
Oat	4.24	1.4	5.89

## Sheet: DMI
		Dray matter digestibility
	1 April	15 April	29 April	7 May
Triticale	77.87	78.01	76.02	75.31
Oat	77.21	78.15	76.2	77.48
	1 April	21 April	12 May
Triticale	74.23	69.97	66.84
Oat	74.63	70.96	68.26
	11 April	28 April	18 May
Triticale	65	73.81	59.45
Oat	65.69	73.85	60.16

[truncated: 9 more sheets: ME, ASH, P, K, Ca, Mg, Fe, Zn, Mn]
